# Supplementary material for: Cerebral Small Vessel Disease Progression and the Risk of Dementia: A 14-Year Follow-Up Study
Source: Atypon-hosted journal article supplement (doi:10.1176/appi.ajp.20220380), 2023-04-19
Supplement: appi.ajp.20220380.ds001.pdf [file appi.ajp.20220380.ds001.pdf]

**TABLE S1. Stratification of dementia etiology**

| Dementia subtype                                | Number of Patients (N and %) |      |
|-------------------------------------------------|------------------------------|------|
|                                                 | N = 108                      | %    |
| Alzheimer's disease                             | 38                           | 31.5 |
| Vascular dementia                               | 34                           | 31.5 |
| Mixed Alzheimer's disease/<br>vascular dementia | 26                           | 24.1 |
| Lewy body dementia                              | 3                            | 2.8  |
| Frontotemporal dementia                         | 2                            | 1.9  |
| Parkinson dementia                              | 2                            | 1.9  |
| Progressive supranuclear palsy                  | 1                            | 0.9  |
| Mixed Parkinson dementia/<br>Vascular dementia  | 1                            | 0.9  |
| Unknown                                         | 1                            | 0.9  |

**TABLE S2. Baseline characteristics of patients with incident Alzheimer’s dementia, Vascular dementia and mixed dementia (AD/VaD)**

|                                                          | Alzheimer’s Dementia<br>(N = 38) |               | Vascular Dementia<br>(N = 34) |                | Mixed<br>(AD/VaD) group<br>(N = 26) |               | P value |
|----------------------------------------------------------|----------------------------------|---------------|-------------------------------|----------------|-------------------------------------|---------------|---------|
|                                                          | Mean/Median/N                    | SD/IQR/%      | Mean/Median/N                 | SD/IQR/%       | Mean/Median/N                       | SD/IQR/%      |         |
| <b>Demographics</b>                                      |                                  |               |                               |                |                                     |               |         |
| Age                                                      | 73.2                             | 6.9           | 72.6                          | 6.9            | 73.4                                | 4.6           | 0.89    |
| Men                                                      | 18                               | 47.4%         | 22                            | 64.7%          | 15                                  | 57.7%         | 0.33    |
| <b>Cognition</b>                                         |                                  |               |                               |                |                                     |               |         |
| More than primary education level                        | 31                               | 81.6%         | 26                            | 76.5%          | 23                                  | 88.5%         | 0.49    |
| MMSE score                                               | 28                               | 26 – 29       | 28                            | 26 – 29        | 28                                  | 26.8 – 28     | 0.98    |
| Cognitive Index                                          | -0.42                            | -0.92 – 0.04) | -0.70                         | -1.12 – -0.51) | -0.48                               | -0.65 – 0.07) | 0.013   |
| <b>Vascular Risk Factors</b>                             |                                  |               |                               |                |                                     |               |         |
| Hypertension                                             | 30                               | 78.9%         | 30                            | 88.2%)         | 21                                  | 80.8%         | 0.56    |
| Diabetes                                                 | 7                                | 18.4%)        | 8                             | 23.5%          | 2                                   | 7.7%          | 0.27    |
| Hypercholesterolemia                                     | 18                               | 47.4          | 21                            | 61.8%          | 13                                  | 50.0%         | 0.44    |
| Smoking                                                  | 24                               | 63.2%         | 26                            | 76.5%          | 16                                  | 61.5%         | 0.37    |
| <b>MRI Characteristics</b>                               |                                  |               |                               |                |                                     |               |         |
| Fazekas score (IQR)                                      | 1                                | 1 – 2         | 2                             | 1 – 3)         | 2                                   | 1 – 2         | <0.001  |
| WMH, ml (IQR)                                            | 4.38                             | 1.74 – 10.50  | 14.85                         | 6.14 – 37.69   | 15.40                               | 5.52 – 18.84  | <0.001  |
| Presence of lacunes, N (%)                               | 7                                | 18.4%         | 23                            | 67.6%          | 9                                   | 34.6%         | <0.001  |
| Presence of microbleeds <sup>a</sup>                     | 4                                | 10.5%         | 14                            | 41.2%          | 4                                   | 15.4%         | 0.005   |
| Presence of DWI+ lesions,                                | 2                                | 5.3%          | 5                             | 14.7%          | 2                                   | 0.08%         | 0.37    |
| PSMD of white matter 10 <sup>-3</sup> mm <sup>2</sup> /s | 0.34                             | 0.31 – 0.38   | 0.44                          | 0.34 – 0.56    | 0.39                                | 0.34 – 0.42   | 0.001   |
| HV, ml                                                   | 6.74                             | 0.79          | 6.83                          | 0.77           | 6.88                                | 0.67          | 0.76    |
| TBV, ml                                                  | 1015.37                          | 61.00         | 989.87                        | 69.49          | 999.38                              | 79.06         | 0.21    |
| GMV, ml                                                  | 582.41                           | 49.62         | 558.17                        | 46.20          | 575.81                              | 33.71         | 0.07    |
| WMV, ml                                                  | 432.96                           | 32.75         | 431.70                        | 44.58          | 423.57                              | 67.16         | 0.72    |

Data represent numbers (%), means ± SD, or medians (IQR). MMSE: Mini Mental State Examination, IQR: Interquartile Range, WMH: White Matter Hyperintensities, DWI+: Diffusion-Weighted Imaging positive, PSMD: Peak width of Skeletonized Mean Diffusivity, Hippocampus Volume, GMV: Grey Matter Volume, WMV: White Matter Volume. <sup>a</sup>1 patient excluded because of insufficient scan quality.

**TABLE S3. Association between MRI characteristics of SVD and incident Alzheimer’s disease and vascular dementia**

| MRI Characteristics                                                     | Model 1<br>Alzheimer’s Disease<br>(N = 38) |         | Model 2<br>Alzheimer’s Disease<br>(N = 38) |         | Model 1<br>Vascular Dementia<br>(N = 34) |         | Model 2<br>Vascular Dementia<br>(N = 34) |         |
|-------------------------------------------------------------------------|--------------------------------------------|---------|--------------------------------------------|---------|------------------------------------------|---------|------------------------------------------|---------|
|                                                                         | HR (95% CI)                                | p-value | HR (95% CI)                                | p-value | HR (95% CI)                              | p-value | HR (95% CI)                              | p-value |
| WMH (ml) per 1-SD increase <sup>a</sup>                                 | 0.68 (0.46 – 1.03)                         | 0.07    | 0.51 (0.33 – 0.79)                         | 0.002   | 3.08 (1.75 – 5.44)                       | 0.001   | 3.06 (1.82 – 5.16)                       | 0.001   |
| Presence of lacunes                                                     | 0.50 (0.21 – 1.18)                         | 0.11    | 0.35 (0.15 – 0.82)                         | 0.02    | 3.88 (1.74 – 8.65)                       | <0.001  | 4.22 (1.99 – 8.93)                       | <0.001  |
| Presence of microbleeds                                                 | 0.40 (0.15 – 1.07)                         | 0.07    | 0.39 (0.13 – 1.11)                         | 0.08    | 2.31 (1.12 – 4.78)                       | 0.02    | 2.93 (1.43 – 5.97)                       | 0.003   |
| Presence of DWI <sup>+</sup> lesions                                    | 1.50 (0.35 – 6.34)                         | 0.58    | 0.89 (0.21 – 3.84)                         | 0.88    | 4.62 (1.48 – 14.43)                      | 0.008   | 4.26 (1.58 – 11.46)                      | 0.004   |
| PSMD white matter 10 <sup>-3</sup> mm <sup>2</sup> /s per 1-SD increase | 0.67 (0.48 – 0.95)                         | 0.03    | 0.45 (0.27 – 0.77)                         | 0.003   | 2.32 (1.65 – 3.25)                       | <0.001  | 2.12 (1.59 – 2.82)                       | <0.001  |
| HV (ml) per 1-SD decrease                                               | 2.50 (1.54 – 4.00)                         | <0.001  | 1.56 (1.67 – 3.85)                         | <0.001  | 1.75 (1.18 – 2.56)                       | 0.006   | 1.25 (0.75 – 2.08)                       | 0.39    |
| TBV (ml) per 1-SD decrease                                              | 1.15 (0.84-1.52)                           | 0.37    | 1.11 (0.79-1.44)                           | 0.42    | 1.97 (1.24-2.89)                         | 0.007   | 1.71 (0.91-1.87)                         | 0.17    |
| GMV (ml) per 1-SD decrease                                              | 1.03 (0.65 – 1.64)                         | 0.88    | 0.72 (0.45 – 1.15)                         | 0.17    | 2.08 (1.32 – 3.22)                       | 0.001   | 1.85 (1.14 – 3.03)                       | 0.01    |
| WMV (ml) per 1-SD decrease                                              | 1.14 (0.82 – 1.56)                         | 0.44    | 1.06 (0.71 – 1.59)                         | 0.44    | 1.10 (0.76 – 1.61)                       | 0.611   | 1.03 (0.72 – 1.47)                       | 0.86    |

Cox proportional hazards analyses for studying associations between SVD-markers and Alzheimer’s disease and vascular dementia. Model 1: Adjusted for age, sex, CES-D score, education level, and vascular risk factor score. Model 2: Additionally adjusted for hippocampal volume; hippocampal volume was adjusted for PSMD. When analyzing Alzheimer’s Disease or vascular dementia, all other dementia cases were excluded from the analyses. WMH: White Matter Hyperintensities, DWI+: Diffusion-Weighted Imaging positive, PSMD: Peak width of Skeletonized Mean Diffusivity, Hippocampus Volume, TBV: Total Brain Volume, GMV: Grey Matter Volume, WMV: White Matter Volume. <sup>a</sup>Log-transformed.

**TABLE S4. Sensitivity analysis on the association between baseline MRI characteristics and incident all-cause dementia after the first follow-up**

| MRI Characteristics                                                                  | All-Cause Dementia<br>(N =68) |             |         |
|--------------------------------------------------------------------------------------|-------------------------------|-------------|---------|
|                                                                                      | HR                            | 96%CI       | p-value |
| WMH (ml) per 1-SD increase <sup>a</sup>                                              | 1.36                          | 1.17 – 1.81 | 0.006   |
| Presence of lacunes                                                                  | 1.30                          | 0.86 – 1.95 | 0.21    |
| Presence of microbleeds <sup>b</sup>                                                 | 1.24                          | 0.76 – 2.00 | 0.39    |
| Presence of DWI <sup>+</sup> lesions <sup>c</sup>                                    | 2.19                          | 1.09 – 4.41 | 0.03    |
| PSMD white matter 10 <sup>-3</sup> mm <sup>2</sup> /s per 1-SD increase <sup>c</sup> | 1.30                          | 1.08 – 1.63 | <0.001  |
| HV (ml) per 1-SD decrease                                                            | 1.74                          | 1.34 – 2.27 | < 0.001 |
| TBV (ml) per 1-SD decrease                                                           | 1.31                          | 0.95-1.56   | 0.13    |
| GMV (ml) per 1-SD decrease                                                           | 1.17                          | 0.91 – 1.51 | 0.37    |
| WMV (ml) per 1-SD decrease                                                           | 1.23                          | 1.03 – 1.51 | 0.04    |

Cox proportional hazards analyses for studying associations between SVD-markers and all-cause dementia. Model 1: Adjusted for age, sex, CES-D score, education level, and vascular risk factor score. Model 2: Additionally adjusted for hippocampal volume; hippocampal volume was adjusted for PSMD. HR: Hazard Ratio, WMH: White Matter Hyperintensities, DWI<sup>+</sup>: Diffusion-Weighted Imaging positive, PSMD: Peak width of Skeletonized Mean Diffusivity, HV: Hippocampus Volume, TBV: Total Brain Volume, GMV: Grey Matter Volume, WMV: White Matter Volume. <sup>a</sup>Log-transformed. <sup>b</sup>3 patients excluded because of insufficient scan quality; <sup>c</sup>4 patients excluded because of insufficient scan quality.
